# Supplementary material for: Early versus late initiation of renal replacement therapy in critically ill patients with acute kidney injury (The ELAIN-Trial): study protocol for a randomized controlled trial
Source: PubMed Central journal article supplement (PMC4797166; doi:10.1186/s13063-016-1249-9), 2016-03-18
Supplement: 13063_2016_1249_MOESM3_ESM.pdf [file 13063_2016_1249_MOESM3_ESM.pdf]

|                                        | <b>Parameters at the time of RRT</b>                                          |                                                                                                             |                                                    |
|----------------------------------------|-------------------------------------------------------------------------------|-------------------------------------------------------------------------------------------------------------|----------------------------------------------------|
| <b>Study</b>                           | <b>Early RRT</b>                                                              | <b>Late RRT</b>                                                                                             | <b>Outcome</b>                                     |
| Bagshaw et al. ; prospective study     | Serum creatinine $\leq$ 309 $\mu$ mol/l;<br>serum urea $\leq$ 24.2 mmol/l     | Serum creatinine $>$ 309 $\mu$ mol/l;<br>serum urea $>$ 24.2 mmol/l                                         | Hospital mortality, 71 versus 53.4%, p $<$ 0.00001 |
| Shiao et al. ; prospective study       | AKI as per RIFLE classification;<br>no AKI or RIFLE Risk                      | AKI as per RIFLE classification;<br>RIFLE Injury or Failure                                                 | Hospital mortality, 43 versus 75%, p = 0.002       |
| Chou et al.; retrospective study       | RIFLE-o or RIFLE-Risk                                                         | RIFLE-Injury or RIFLE-Failure                                                                               | Hospital mortality, 70.8 versus 69.7 %, p $>$ 0.05 |
| Liu et al.; prospective study          | Serum urea $<$ 27.1 mmol/l                                                    | Serum urea $>$ 27.1 mmol/l                                                                                  | Hospital mortality, 35 versus 41%, p=0.09          |
| Gettings et al.; retrospective study   | Serum urea $<$ 21.4 mmol/l                                                    | Serum urea $>$ 21.4 mmol/l                                                                                  | Hospital mortality, 61 versus 80%, p = 0.041       |
| Elahi et al.; retrospective study      | Urine output $<$ 100 ml in 8 h                                                | Serum urea $\geq$ 30 mmol/l or<br>serum creatinine $\geq$ 250 $\mu$ mol/l or<br>K <sup>+</sup> $>$ 6 mmol/l | Hospital mortality, 22 versus 43%, p $<$ 0.05      |
| Bouman et al.; RCT                     | Urine output $<$ 30 ml/h for 6 h<br>and creatinine clearance $<$ 20<br>ml/min | Serum urea $>$ 40 mmol/l or K <sup>+</sup> $>$<br>6.5 mmol/l or severe pulmonary<br>edema                   | 28-day mortality, 29 versus 25%, p = 0.8           |
| Demirkilic et al.; retrospective study | Urine output $<$ 100 ml within 8h<br>post-surgery                             | Serum creatinine $>$ 440 $\mu$ mol/l or<br>K <sup>+</sup> $>$ 5.5 mmol/l                                    | Hospital mortality, 23.5 versus 56%, p = 0.016     |
| Sugahara et al.; RCT                   | Urine output $<$ 30 ml/h for 3h                                               | Urine output $<$ 20 ml/h for 2h                                                                             | 14-day mortality, 14 versus 86%, p $<$ 0.01        |

**Table 1 Literature overview:** The ELAIN-trial was planned based on these findings. The mortality rate in the late group was estimated 55%. The reduction of 18% is calculated on the mortality difference between the early and the late group, which results in a difference of 17.9778% favoring the early group.
